# Supplementary material
Source: PubMed Central journal article supplement (PMC6120218)
Supplement: supp_RA118.003381_137332_2_supp_157652_pjjn4x.pdf [file supp_RA118.003381_137332_2_supp_157652_pjjn4x.pdf]

**Table 2.** List of peptides on peptide microarray with normalized signal associated with each BD

| Peptide                                | BD1   | BD2   | BD3   | BD4   | BD5   | BD6   |
|----------------------------------------|-------|-------|-------|-------|-------|-------|
| H3 (1-20)                              | 0.236 | 0.086 | 0.130 | 0.215 | 0.213 | 0.000 |
| H3K14ac                                | 0.139 | 0.556 | 0.091 | 0.779 | 0.224 | 0.062 |
| H3K9ac                                 | 0.215 | 0.113 | 0.140 | 0.155 | 0.211 | 0.001 |
| H3K4ac                                 | 0.005 | 0.000 | 0.000 | 0.007 | 0.000 | 0.000 |
| H3K4ac + K14ac                         | 0.111 | 0.532 | 0.032 | 0.485 | 0.142 | 0.019 |
| H3K9ac + K14ac                         | 0.073 | 0.486 | 0.003 | 0.528 | 0.210 | 0.000 |
| H3K4ac + K9ac                          | 0.121 | 0.008 | 0.006 | 0.035 | 0.162 | 0.000 |
| H3K4ac + K9ac + K14ac                  | 0.007 | 0.501 | 0.000 | 0.396 | 0.040 | 0.006 |
| H3K18ac                                | 0.303 | 0.182 | 0.225 | 0.230 | 0.251 | 0.000 |
| H3K14ac + K18ac                        | 0.082 | 0.360 | 0.050 | 0.312 | 0.089 | 0.000 |
| H3K9ac + K18ac                         | 0.091 | 0.029 | 0.033 | 0.042 | 0.059 | 0.046 |
| H3K4ac + K18ac                         | 0.066 | 0.018 | 0.027 | 0.061 | 0.076 | 0.144 |
| H3K9ac + K14ac + K18ac                 | 0.013 | 0.357 | 0.000 | 0.246 | 0.016 | 0.000 |
| H3K4ac + K14ac + K18ac                 | 0.591 | 0.659 | 0.673 | 0.369 | 0.446 | 0.136 |
| H3K4ac + K9ac + K18ac                  | 0.001 | 0.000 | 0.000 | 0.003 | 0.000 | 0.011 |
| H3K4ac + K9ac + K14ac + K18ac          | 0.000 | 0.374 | 0.026 | 0.471 | 0.061 | 0.000 |
| H3K4me3                                | 0.004 | 0.000 | 0.000 | 0.010 | 0.000 | 0.198 |
| H3K4me3 + K9ac                         | 0.212 | 0.072 | 0.096 | 0.094 | 0.245 | 0.000 |
| H3K4me3 + K14ac                        | 0.144 | 0.474 | 0.108 | 0.547 | 0.200 | 0.067 |
| H3K4me3 + K18ac                        | 0.152 | 0.036 | 0.013 | 0.103 | 0.134 | 0.054 |
| H3K4me3 + K9ac + K14ac                 | 0.077 | 0.508 | 0.029 | 0.594 | 0.263 | 0.000 |
| H3K4me3 + K9ac + K18ac                 | 0.121 | 0.033 | 0.033 | 0.084 | 0.061 | 0.000 |
| H3K4me3 + K14ac + K18ac                | 0.186 | 0.348 | 0.146 | 0.344 | 0.202 | 0.147 |
| H3K4me3 + K9ac + K14ac + K18ac         | 0.021 | 0.169 | 0.021 | 0.275 | 0.011 | 0.010 |
| H3T3p + K4me3 + K9ac + K14ac + K18ac   | 0.000 | 0.008 | 0.010 | 0.055 | 0.002 | 0.215 |
| H3T3p + K4me3                          | 0.034 | 0.000 | 0.004 | 0.007 | 0.010 | 0.000 |
| H3R2me2a + T3p + K4me3 + K9ac + K14ac  | 0.000 | 0.007 | 0.000 | 0.000 | 0.000 | 0.005 |
| H3R2me2a + T3p + K4me3                 | 0.021 | 0.000 | 0.000 | 0.000 | 0.000 | 0.024 |
| H3R2me2a + K4me3                       | 0.094 | 0.008 | 0.013 | 0.037 | 0.143 | 1.000 |
| H3K4me2                                | 0.060 | 0.026 | 0.029 | 0.051 | 0.058 | 0.000 |
| H3K4me2 + K9ac + K14ac + K18ac         | 0.000 | 0.051 | 0.000 | 0.065 | 0.000 | 0.000 |
| H3K4me1                                | 0.162 | 0.025 | 0.061 | 0.042 | 0.057 | 0.035 |
| H3K4me1 + K9ac + K14ac + K18ac         | 0.000 | 0.005 | 0.000 | 0.031 | 0.000 | 0.000 |
| H3S10p                                 | 0.008 | 0.000 | 0.000 | 0.008 | 0.000 | 0.000 |
| H3K4ac + K9ac + S10p + K14ac + K18ac   | 0.000 | 0.001 | 0.012 | 0.000 | 0.000 | 0.000 |
| H3K4me3 + S10p                         | 0.036 | 0.000 | 0.000 | 0.021 | 0.093 | 0.000 |
| H3K4me3 + K9ac + S10p + K14ac + K18ac  | 0.000 | 0.004 | 0.000 | 0.002 | 0.001 | 0.043 |
| H3R2me2a + K4me3 + S10p                | 0.045 | 0.008 | 0.004 | 0.016 | 0.000 | 0.060 |
| H3R2me2a + K4me3 + K9ac + S10p + K14ac | 0.000 | 0.005 | 0.000 | 0.000 | 0.000 | 0.000 |
| H3K9me3                                | 0.064 | 0.031 | 0.032 | 0.087 | 0.035 | 0.000 |
| H3K4ac + K9me3 + K14ac + K18ac         | 0.000 | 0.059 | 0.000 | 0.075 | 0.001 | 0.000 |
| H3K4me2 + K9ac + K18ac                 | 0.002 | 0.000 | 0.000 | 0.001 | 0.000 | 0.000 |

|                                         |       |       |       |       |       |       |
|-----------------------------------------|-------|-------|-------|-------|-------|-------|
| H3K4me1 + K9ac + K18ac                  | 0.000 | 0.000 | 0.000 | 0.122 | 0.000 | 0.000 |
| H3R2me2a                                | 0.051 | 0.000 | 0.016 | 0.024 | 0.091 | 0.000 |
| H3R2me2a + K4ac + K9ac + K14ac + K18ac  | 0.000 | 0.023 | 0.000 | 0.036 | 0.001 | 0.015 |
| H3R2me2a + K4me3 + K9ac + K14ac + K18ac | 0.000 | 0.010 | 0.000 | 0.027 | 0.000 | 0.000 |
| H3R2me1 + K4me3                         | 0.080 | 0.008 | 0.011 | 0.031 | 0.044 | 0.000 |
| H3R2me1 + K4me3 + K9ac + K14ac + K18ac  | 0.000 | 0.004 | 0.000 | 0.035 | 0.000 | 0.000 |
| H3Cit2                                  | 0.008 | 0.000 | 0.000 | 0.020 | 0.001 | 0.000 |
| H3Cit2 + K4me3                          | 0.006 | 0.000 | 0.000 | 0.004 | 0.000 | 0.000 |
| H3Cit2 + K4me3 + K9ac + K14ac + K18ac   | 0.000 | 0.014 | 0.051 | 0.026 | 0.000 | 0.000 |
| H3Cit2 + K4ac + K9ac + K14ac + K18ac    | 0.000 | 0.005 | 0.000 | 0.010 | 0.000 | 0.000 |
| H3T3p                                   | 0.033 | 0.001 | 0.002 | 0.013 | 0.002 | 0.000 |
| H4 (1-23)                               | 0.996 | 1.000 | 0.685 | 0.644 | 1.000 | 0.000 |
| H4K5ac + K8ac + K12ac + K16ac           | 0.063 | 0.166 | 0.000 | 0.014 | 0.076 | 0.028 |
| H3R2me2a + K4me2                        | 0.294 | 0.112 | 0.121 | 0.164 | 0.210 | 0.054 |
| H3R2me2s + K4me2                        | 0.256 | 0.075 | 0.118 | 0.213 | 0.277 | 0.057 |
| H3R2me1 + K4me2                         | 0.169 | 0.142 | 0.152 | 0.199 | 0.154 | 0.000 |
| H3Cit2 + K4me2                          | 0.174 | 0.089 | 0.109 | 0.114 | 0.138 | 0.000 |
| H3K4N3                                  | 0.053 | 0.000 | 0.000 | 0.016 | 0.003 | 0.000 |
| H4K5ac                                  | 0.596 | 0.571 | 0.725 | 0.799 | 0.329 | 0.223 |
| H4K8ac                                  | 0.624 | 0.534 | 0.451 | 0.472 | 0.590 | 0.000 |
| H4K12ac                                 | 0.552 | 0.724 | 0.572 | 0.616 | 0.746 | 0.106 |
| H4K16ac                                 | 0.729 | 0.735 | 0.582 | 0.524 | 0.585 | 0.205 |
| H4K5ac + K12ac                          | 0.471 | 0.443 | 0.269 | 0.257 | 0.381 | 0.267 |
| H4K8ac + K16ac                          | 0.506 | 0.295 | 0.251 | 0.232 | 0.380 | 0.000 |
| H4K5ac + K8ac + K12ac                   | 0.360 | 0.198 | 0.172 | 0.245 | 0.362 | 0.075 |
| H4R3me2a                                | 0.843 | 0.611 | 0.552 | 0.437 | 0.741 | 0.818 |
| H4R3me2s                                | 0.780 | 0.596 | 0.583 | 0.511 | 0.495 | 0.623 |
| H4R3me1                                 | 0.583 | 0.509 | 0.415 | 0.487 | 0.447 | 0.591 |
| H4S1p + R3me2a                          | 0.327 | 0.262 | 0.176 | 0.215 | 0.311 | 0.098 |
| H4S1p + R3me2s                          | 0.367 | 0.154 | 0.176 | 0.183 | 0.286 | 0.004 |
| H4S1p + R3me1                           | 0.359 | 0.163 | 0.086 | 0.275 | 0.223 | 0.229 |
| H4R3me2a + K5ac + K8ac + K12ac + K16ac  | 0.011 | 0.000 | 0.000 | 0.001 | 0.000 | 0.000 |
| H4R3me2s + K5ac + K8ac + K12ac + K16ac  | 0.003 | 0.021 | 0.010 | 0.049 | 0.027 | 0.000 |
| H4R3me1 + K5ac + K8ac + K12ac + K16ac   | 0.001 | 0.000 | 0.000 | 0.000 | 0.004 | 0.000 |
| H4K20me3                                | 0.236 | 0.185 | 0.197 | 0.373 | 0.312 | 0.061 |
| H4K20me2                                | 0.102 | 0.045 | 0.051 | 0.086 | 0.068 | 0.050 |
| H4K20me1                                | 0.140 | 0.051 | 0.082 | 0.087 | 0.097 | 0.000 |
| H4K12ac + K16ac + K20me2                | 0.000 | 0.000 | 0.000 | 0.000 | 0.000 | 0.000 |
| H4K12ac + K16ac                         | 0.037 | 0.003 | 0.046 | 0.002 | 0.005 | 0.000 |
| H3K4me3 + R8me2s + K9me3                | 0.026 | 0.000 | 0.000 | 0.019 | 0.005 | 0.008 |
| H3 (15-41)                              | 0.189 | 0.116 | 0.037 | 0.115 | 0.143 | 0.000 |
| H3K18me3                                | 0.155 | 0.112 | 0.224 | 0.175 | 0.078 | 0.000 |
| H3K9me2+K14Ac                           | 0.002 | 0.096 | 0.000 | 0.172 | 0.039 | 0.000 |
| H3K36me3                                | 0.108 | 0.019 | 0.063 | 0.093 | 0.019 | 0.000 |
| H3K18me3 + K36me3                       | 0.086 | 0.032 | 0.068 | 0.118 | 0.107 | 0.000 |

|                                      |       |       |       |       |       |       |
|--------------------------------------|-------|-------|-------|-------|-------|-------|
| H3K4me3 + R8me2a + K9me3             | 0.039 | 0.000 | 0.003 | 0.028 | 0.020 | 0.000 |
| H4 (11-27)                           | 0.145 | 0.061 | 0.028 | 0.138 | 0.147 | 0.000 |
| H3 (74-84) N-ac                      | 0.001 | 0.000 | 0.000 | 0.000 | 0.000 | 0.000 |
| H3K79me1                             | 0.000 | 0.000 | 0.000 | 0.000 | 0.002 | 0.000 |
| H3K36me3 (y27-45)                    | 0.016 | 0.000 | 0.000 | 0.003 | 0.003 | 0.000 |
| H3K36me2 (y27-45)                    | 0.000 | 0.000 | 0.000 | 0.000 | 0.000 | 0.000 |
| H3K36ac (y27-45)                     | 0.000 | 0.000 | 0.000 | 0.000 | 0.006 | 0.000 |
| H3 (27-45)                           | 0.069 | 0.001 | 0.007 | 0.015 | 0.000 | 0.000 |
| H3T3p                                | 0.033 | 0.001 | 0.002 | 0.013 | 0.002 | 0.000 |
| H3.3K36me1                           | 0.018 | 0.000 | 0.000 | 0.003 | 0.001 | 0.000 |
| H3K9me2 + K27me2                     | 0.112 | 0.022 | 0.005 | 0.032 | 0.059 | 0.000 |
| H3K4me3 + K9me3                      | 0.036 | 0.000 | 0.000 | 0.012 | 0.012 | 0.000 |
| H3K9me2                              | 0.068 | 0.000 | 0.001 | 0.018 | 0.035 | 0.000 |
| H3K9me1                              | 0.028 | 0.000 | 0.000 | 0.003 | 0.020 | 0.000 |
| H3K4me1 + K18ac                      | 0.017 | 0.000 | 0.000 | 0.004 | 0.004 | 0.000 |
| H3T11p                               | 0.001 | 0.000 | 0.000 | 0.001 | 0.015 | 0.000 |
| H3K18me3                             | 0.155 | 0.112 | 0.224 | 0.175 | 0.042 | 0.000 |
| H3K18me2                             | 0.075 | 0.001 | 0.001 | 0.011 | 0.049 | 0.019 |
| H3K18me1                             | 0.050 | 0.006 | 0.000 | 0.006 | 0.010 | 0.153 |
| H3R8me1                              | 0.034 | 0.000 | 0.000 | 0.011 | 0.024 | 0.000 |
| H3R8me2a                             | 0.060 | 0.000 | 0.000 | 0.023 | 0.026 | 0.000 |
| H3R8me2s                             | 0.036 | 0.000 | 0.000 | 0.009 | 0.005 | 0.133 |
| H3K9ac + S10p                        | 0.000 | 0.000 | 0.000 | 0.000 | 0.016 | 0.000 |
| H3K9me3 + S10p                       | 0.007 | 0.005 | 0.000 | 0.000 | 0.000 | 0.000 |
| H3K9me2 + S10p                       | 0.002 | 0.000 | 0.000 | 0.000 | 0.005 | 0.038 |
| H3K9me1 + S10p                       | 0.004 | 0.000 | 0.000 | 0.000 | 0.000 | 0.000 |
| H3K4me3 + K9ac + S10p                | 0.000 | 0.000 | 0.000 | 0.001 | 0.000 | 0.000 |
| H3R17me2a                            | 0.090 | 0.057 | 0.104 | 0.147 | 0.097 | 0.000 |
| H3R17me2s                            | 0.068 | 0.019 | 0.054 | 0.074 | 0.044 | 0.030 |
| H3R17me1                             | 0.069 | 0.076 | 0.079 | 0.053 | 0.066 | 0.000 |
| H3K14me2                             | 0.036 | 0.006 | 0.000 | 0.014 | 0.016 | 0.000 |
| H3K14me3                             | 0.043 | 0.002 | 0.007 | 0.016 | 0.018 | 0.000 |
| H3R2me2s + K4me3                     | 0.053 | 0.000 | 0.000 | 0.000 | 0.004 | 0.000 |
| H3K18ac (1-25)                       | 0.060 | 0.034 | 0.051 | 0.051 | 0.032 | 0.000 |
| H3R17me2a (1-25)                     | 0.088 | 0.041 | 0.037 | 0.096 | 0.074 | 0.000 |
| H3R17me2a + K18ac (1-25)             | 0.067 | 0.004 | 0.016 | 0.069 | 0.014 | 0.000 |
| H3 (1-25)                            | 0.062 | 0.009 | 0.020 | 0.075 | 0.053 | 0.000 |
| H3T6p                                | 0.021 | 0.006 | 0.140 | 0.010 | 0.004 | 0.049 |
| H3K4me3 + T6p                        | 0.000 | 0.000 | 0.003 | 0.000 | 0.000 | 0.078 |
| H3K4me2 + T6p                        | 0.005 | 0.000 | 0.000 | 0.005 | 0.026 | 0.000 |
| H3T6p + K9ac + K14ac + K18ac         | 0.000 | 0.000 | 0.000 | 0.001 | 0.000 | 0.000 |
| H3K4me3 + T6p + K9ac + K14ac + K18ac | 0.000 | 0.006 | 0.000 | 0.015 | 0.000 | 0.000 |
| H3K4me2 + T6p + K9ac + K14ac + K18ac | 0.006 | 0.000 | 0.010 | 0.009 | 0.000 | 0.027 |
| H3K23ac                              | 0.000 | 0.000 | 0.000 | 0.000 | 0.000 | 0.000 |
| H3R2me2a+K9me2                       | 0.002 | 0.000 | 0.000 | 0.016 | 0.000 | 0.000 |

|                                          |       |       |       |       |       |       |
|------------------------------------------|-------|-------|-------|-------|-------|-------|
| H3R2me2s + K4me3 + K9ac + K14ac + K18ac  | 0.000 | 0.044 | 0.000 | 0.068 | 0.000 | 0.000 |
| H3R8me1 + K9me3                          | 0.078 | 0.020 | 0.000 | 0.032 | 0.030 | 0.000 |
| H3R8me1 + K9me2                          | 0.045 | 0.004 | 0.007 | 0.008 | 0.002 | 0.043 |
| H3R8me2a + K9me3                         | 0.016 | 0.000 | 0.000 | 0.007 | 0.003 | 0.000 |
| H3R8me2a + K9me2                         | 0.028 | 0.001 | 0.013 | 0.026 | 0.006 | 0.000 |
| H3R8me2a + K9me1                         | 0.024 | 0.000 | 0.000 | 0.000 | 0.004 | 0.000 |
| H3R8me2s + K9me3                         | 0.040 | 0.003 | 0.003 | 0.010 | 0.001 | 0.000 |
| H3R8me2s + K9me2                         | 0.024 | 0.000 | 0.000 | 0.014 | 0.005 | 0.000 |
| H3R8me2s + K9me1                         | 0.033 | 0.001 | 0.000 | 0.005 | 0.022 | 0.000 |
| H3K4ac + K9me2 + K14ac + K18ac           | 0.000 | 0.019 | 0.000 | 0.022 | 0.001 | 0.000 |
| H3K4ac + K9me1 + K14ac + K18ac           | 0.000 | 0.025 | 0.000 | 0.042 | 0.001 | 0.000 |
| <b>H3 105-124</b>                        | 0.000 | 0.000 | 0.000 | 0.000 | 0.005 | 0.000 |
| <b>H3 120-135</b>                        | 0.000 | 0.000 | 0.000 | 0.000 | 0.007 | 0.000 |
| H3K9-NIe (1-20)                          | 0.014 | 0.000 | 0.000 | 0.003 | 0.001 | 0.000 |
| H3K14-NIe (1-20)                         | 0.018 | 0.002 | 0.007 | 0.090 | 0.015 | 0.000 |
| H3K23-NIe (15-31)                        | 0.000 | 0.000 | 0.000 | 0.000 | 0.000 | 0.043 |
| H3T6p + K9me3                            | 0.006 | 0.000 | 0.000 | 0.008 | 0.000 | 0.000 |
| H3T6p + R8me2a + K9me3                   | 0.000 | 0.000 | 0.000 | 0.000 | 0.000 | 0.120 |
| H3R26me2a                                | 0.000 | 0.007 | 0.000 | 0.000 | 0.000 | 0.000 |
| H3K4ac + K9me3                           | 0.031 | 0.013 | 0.042 | 0.019 | 0.016 | 0.000 |
| H3K9me2 (1-32)                           | 0.146 | 0.038 | 0.082 | 0.133 | 0.101 | 0.068 |
| H3K9me2 + K27me1 (1-32)                  | 0.110 | 0.019 | 0.039 | 0.135 | 0.074 | 0.119 |
| H3S28p                                   | 0.000 | 0.000 | 0.000 | 0.000 | 0.000 | 0.528 |
| H3 (1-20) N-ac                           | 0.012 | 0.001 | 0.000 | 0.004 | 0.010 | 0.000 |
| H3 (52-61)                               | 0.000 | 0.000 | 0.000 | 0.000 | 0.000 | 0.000 |
| H3K56ac (52-61)                          | 0.001 | 0.005 | 0.000 | 0.000 | 0.000 | 0.000 |
| H3K9me2 (1-15)                           | 0.010 | 0.004 | 0.000 | 0.000 | 0.000 | 0.000 |
| H3K4me1 + K9me2                          | 0.005 | 0.000 | 0.000 | 0.001 | 0.046 | 0.000 |
| H3K4me3 + K9me2                          | 0.003 | 0.000 | 0.000 | 0.000 | 0.000 | 0.000 |
| H3K4A + K9me2 (1-15)                     | 0.000 | 0.000 | 0.000 | 0.180 | 0.000 | 0.233 |
| H2A (1-17)                               | 0.146 | 0.023 | 0.046 | 0.058 | 0.103 | 0.000 |
| H2AK5ac                                  | 0.014 | 0.000 | 0.000 | 0.003 | 0.000 | 0.000 |
| H2AR3me2a + K5ac                         | 0.007 | 0.000 | 0.000 | 0.018 | 0.000 | 0.000 |
| H2AS1p + R3me2a + K5ac                   | 0.001 | 0.000 | 0.000 | 0.000 | 0.000 | 0.000 |
| H2AK5ac + K9ac + K13ac + K15ac (no N-ac) | 0.000 | 0.000 | 0.000 | 0.000 | 0.015 | 0.000 |
| H2AX (132-142)                           | 0.000 | 0.000 | 0.000 | 0.000 | 0.003 | 0.000 |
| Flag-Tag                                 | 0.000 | 0.000 | 0.000 | 0.000 | 0.000 | 0.002 |
| His-Tag                                  | 0.000 | 0.000 | 0.000 | 0.000 | 0.000 | 0.052 |
| Myc-Tag                                  | 0.000 | 0.000 | 0.000 | 0.021 | 0.000 | 0.057 |
| V5-Tag                                   | 0.000 | 0.000 | 0.000 | 0.055 | 0.000 | 0.000 |
| H2A.Z (1-19)                             | 0.005 | 0.000 | 0.000 | 0.005 | 0.000 | 0.055 |
| H3Cit8 (1-21)                            | 0.006 | 0.000 | 0.000 | 0.001 | 0.014 | 0.000 |
| H3 (21-44)                               | 0.035 | 0.005 | 0.008 | 0.018 | 0.000 | 0.000 |
| H3K36me1 (21-44)                         | 0.022 | 0.003 | 0.004 | 0.012 | 0.004 | 0.000 |
| H3K36me2 (21-44)                         | 0.011 | 0.000 | 0.000 | 0.007 | 0.007 | 0.000 |

|                                        |       |       |       |       |       |       |
|----------------------------------------|-------|-------|-------|-------|-------|-------|
| H3K36me3 (21-44)                       | 0.042 | 0.000 | 0.000 | 0.016 | 0.012 | 0.000 |
| H3K36ac (21-44)                        | 0.045 | 0.018 | 0.028 | 0.049 | 0.008 | 0.000 |
| H3K27acK36me1 (21-44)                  | 0.013 | 0.002 | 0.000 | 0.014 | 0.018 | 0.000 |
| H3K27acK36me2 (21-44)                  | 0.007 | 0.002 | 0.000 | 0.002 | 0.004 | 0.000 |
| H3K27acK36me3 (21-44)                  | 0.003 | 0.000 | 0.000 | 0.000 | 0.000 | 0.000 |
| H2BK120ub1 (Leu-Arg-Gly-Gly) (108-125) | 0.001 | 0.000 | 0.000 | 0.002 | 0.000 | 0.000 |
| H2B (108-125)                          | 0.000 | 0.000 | 0.000 | 0.000 | 0.007 | 0.006 |
| H4 (1-25)                              | 0.565 | 0.158 | 0.195 | 0.527 | 0.166 | 0.016 |
| H4K20me3 (1-23)                        | 1.712 | 3.674 | 1.855 | 1.574 | 1.986 | 1.403 |
| H4K12acK16acK20me3 (1-25)              | 0.175 | 0.083 | 0.058 | 0.111 | 0.089 | 0.000 |
| H4R3me2a + K5ac                        | 0.064 | 0.010 | 0.013 | 0.057 | 0.035 | 0.000 |
| H4 (1-23) (no N-ac)                    | 0.205 | 0.203 | 0.258 | 0.248 | 0.284 | 0.000 |
| H4K20ac                                | 0.228 | 0.130 | 0.269 | 0.202 | 0.239 | 0.032 |
| H4S1p + K5ac + K8ac + K12ac + K16ac    | 0.000 | 0.000 | 0.000 | 0.001 | 0.000 | 0.000 |
| H4S1p (1-23)                           | 0.094 | 0.023 | 0.134 | 0.041 | 0.041 | 0.000 |
| H4K5ac + K8ac                          | 0.042 | 0.011 | 0.019 | 0.030 | 0.067 | 0.000 |
| H4K5ac + K16ac                         | 0.049 | 0.012 | 0.006 | 0.020 | 0.044 | 0.000 |
| H4K5ac + K20ac                         | 0.037 | 0.005 | 0.002 | 0.034 | 0.007 | 0.000 |
| H4K8ac + K12ac                         | 0.057 | 0.002 | 0.000 | 0.011 | 0.006 | 0.000 |
| H4K8ac + K20ac                         | 0.025 | 0.000 | 0.002 | 0.001 | 0.007 | 0.000 |
| H4K12ac + K16ac                        | 0.037 | 0.003 | 0.046 | 0.002 | 0.005 | 0.000 |
| H4K12ac + K20ac                        | 0.034 | 0.000 | 0.003 | 0.002 | 0.000 | 0.000 |
| H4K16ac + K20ac                        | 0.134 | 0.052 | 0.093 | 0.071 | 0.132 | 0.000 |
| H4K12ac + KQ5,8,16,20                  | 0.000 | 0.000 | 0.000 | 0.006 | 0.004 | 0.000 |
| H4K5me1                                | 0.027 | 0.002 | 0.002 | 0.000 | 0.013 | 0.000 |
| H4K8me1                                | 0.074 | 0.059 | 0.088 | 0.079 | 0.070 | 0.000 |
| H4K12me1                               | 0.066 | 0.011 | 0.071 | 0.077 | 0.041 | 0.000 |
| H4K5ac + K8me1 + K12ac                 | 0.038 | 0.005 | 0.011 | 0.021 | 0.030 | 0.000 |
| H4K5me1 + K8ac + K12me1                | 0.061 | 0.038 | 0.111 | 0.086 | 0.085 | 0.000 |
| H4K5me1 + K8me1 + K12me1               | 0.085 | 0.017 | 0.025 | 0.069 | 0.053 | 0.059 |
| H4K8ac + K12ac + K16ac                 | 0.020 | 0.000 | 0.000 | 0.005 | 0.000 | 0.000 |
| H4K5ac + K12ac + K16ac                 | 0.008 | 0.000 | 0.006 | 0.014 | 0.005 | 0.004 |
| H4K5ac + K8ac + K16ac                  | 0.014 | 0.000 | 0.005 | 0.015 | 0.005 | 0.000 |
| H4K5me1 + K8ac + K12ac + K16ac         | 0.005 | 0.000 | 0.000 | 0.000 | 0.000 | 0.000 |
| H4K5ac + K8me1 + K12ac + K16ac         | 0.011 | 0.000 | 0.000 | 0.000 | 0.000 | 0.000 |
| H4K5ac + K8ac + K12me1 + K16ac         | 0.043 | 0.017 | 0.004 | 0.037 | 0.028 | 0.000 |
| H4K20me3 (1-23 N-ac)                   | 0.047 | 0.003 | 0.000 | 0.016 | 0.002 | 0.000 |
| H2B (1-24)                             | 0.032 | 0.000 | 0.012 | 0.071 | 0.013 | 0.000 |
| H2BK5me3                               | 0.022 | 0.000 | 0.002 | 0.054 | 0.012 | 0.000 |
| H2BK5me2                               | 0.042 | 0.012 | 0.003 | 0.067 | 0.038 | 0.000 |
| H2BK5me1                               | 0.114 | 0.007 | 0.002 | 0.017 | 0.040 | 0.000 |
| H2BK12ac                               | 0.001 | 0.000 | 0.000 | 0.000 | 0.000 | 0.000 |
| H2BK15ac                               | 0.003 | 0.003 | 0.000 | 0.023 | 0.013 | 0.000 |
| H2BK16ac                               | 0.002 | 0.000 | 0.000 | 0.002 | 0.005 | 0.000 |
| H2BK20ac                               | 0.011 | 0.001 | 0.000 | 0.001 | 0.001 | 0.000 |

|                                         |       |       |       |       |       |       |
|-----------------------------------------|-------|-------|-------|-------|-------|-------|
| H2BK12ac + K15ac + K16ac + K20ac        | 0.000 | 0.000 | 0.000 | 0.000 | 0.000 | 0.029 |
| H2A (112-129)                           | 0.000 | 0.000 | 0.000 | 0.001 | 0.000 | 0.000 |
| H2AS121p                                | 0.000 | 0.000 | 0.000 | 0.001 | 0.000 | 0.098 |
| cnp1 (1-23)                             | 0.114 | 0.130 | 0.047 | 0.147 | 0.128 | 0.062 |
| cnp1 K2ac + K3ac + K18ac + K19ac (1-23) | 0.016 | 0.000 | 0.000 | 0.000 | 0.000 | 0.000 |
| H2A.X (1-17)                            | 0.094 | 0.000 | 0.002 | 0.012 | 0.025 | 0.000 |
| H2A.X K5ac                              | 0.021 | 0.000 | 0.000 | 0.000 | 0.008 | 0.000 |
| H3K36me3                                | 0.108 | 0.019 | 0.063 | 0.093 | 0.019 | 0.000 |
| H3S31p + K36me3                         | 0.003 | 0.000 | 0.003 | 0.001 | 0.000 | 0.000 |
| H3K23me2 (15-34)                        | 0.000 | 0.000 | 0.000 | 0.000 | 0.000 | 0.000 |
| p53 (366-390)                           | 0.027 | 0.103 | 0.002 | 0.001 | 0.000 | 0.000 |
| p53K370me2                              | 0.026 | 0.000 | 0.000 | 0.015 | 0.000 | 0.000 |
| p53K372me2                              | 0.014 | 0.000 | 0.000 | 0.002 | 0.000 | 0.000 |
| p53K382me2                              | 0.018 | 0.000 | 0.000 | 0.002 | 0.002 | 0.000 |
| p53K382me2 + K386ac                     | 0.000 | 0.000 | 0.000 | 0.000 | 0.000 | 0.000 |
| p53S378p + K382me2                      | 0.000 | 0.000 | 0.000 | 0.000 | 0.003 | 0.000 |
| p53T377p + K382me2                      | 0.000 | 0.002 | 0.000 | 0.014 | 0.042 | 0.000 |
| p53K372me3                              | 0.161 | 0.175 | 0.103 | 0.150 | 0.115 | 0.002 |
| p53K382me3                              | 0.016 | 0.000 | 0.000 | 0.009 | 0.000 | 0.000 |
| H3K9prop                                | 0.003 | 0.000 | 0.000 | 0.006 | 0.032 | 0.000 |
| H3K9but                                 | 0.003 | 0.000 | 0.000 | 0.002 | 0.027 | 0.000 |
| H3K9cr                                  | 0.002 | 0.002 | 0.000 | 0.001 | 0.000 | 0.000 |
| H3K9ub                                  | 0.000 | 0.338 | 0.000 | 0.000 | 0.007 | 0.000 |
| H3K27prop                               | 0.000 | 0.000 | 0.000 | 0.050 | 0.009 | 0.000 |
| H3K27vl                                 | 0.003 | 0.000 | 0.000 | 0.000 | 0.000 | 0.000 |
| H3K27myr                                | 0.000 | 0.000 | 0.000 | 0.002 | 0.000 | 0.012 |
| H3K4me                                  | 0.018 | 0.004 | 0.000 | 0.029 | 0.012 | 0.000 |
| H3K9myr                                 | 0.000 | 0.000 | 0.000 | 0.001 | 0.000 | 0.000 |
| H3K9suc                                 | 0.074 | 0.000 | 0.000 | 0.000 | 0.001 | 0.026 |
