# Supplementary material
Source: PubMed Central journal article supplement (PMC6120218)
Supplement: supp_RA118.003381_137332_2_supp_160998_pb1nvk.pdf [file supp_RA118.003381_137332_2_supp_160998_pb1nvk.pdf]

## Supporting Information

### **Polybromo-1 (PBRM1) bromodomains variably influence nucleosome interactions and cellular function**

**Mariesa J. Slaughter<sup>‡§</sup>, Erin K. Shanle<sup>¶</sup>, Andrew W. McFadden<sup>§</sup>, Emily S. Hollis<sup>§</sup>,  
Lindsey E. Suttle<sup>§</sup>, Brian D. Strahl<sup>‡§¶</sup>, Ian J. Davis<sup>‡§\*\*</sup>**

From the <sup>‡</sup>Department of Genetics, Curriculum in Genetics and Molecular Biology, the <sup>§</sup>Lineberger Comprehensive Cancer Center, the <sup>¶</sup>Department of Biochemistry and Biophysics, University of North Carolina, Chapel Hill, North Carolina 27599, and the <sup>\*\*</sup>Department of Pediatrics, University of North Carolina, Chapel Hill, North Carolina 27514

## Supplementary Figures

Figure S1. Conserved residues between BD1 and BD3 or BD5

Figure S2. Preparation of mono-nucleosomes and validation of recombinant nucleosomes

Figure S3. Calculation of eluted PBRM1 at 200 mM NaCl by salt fractionation

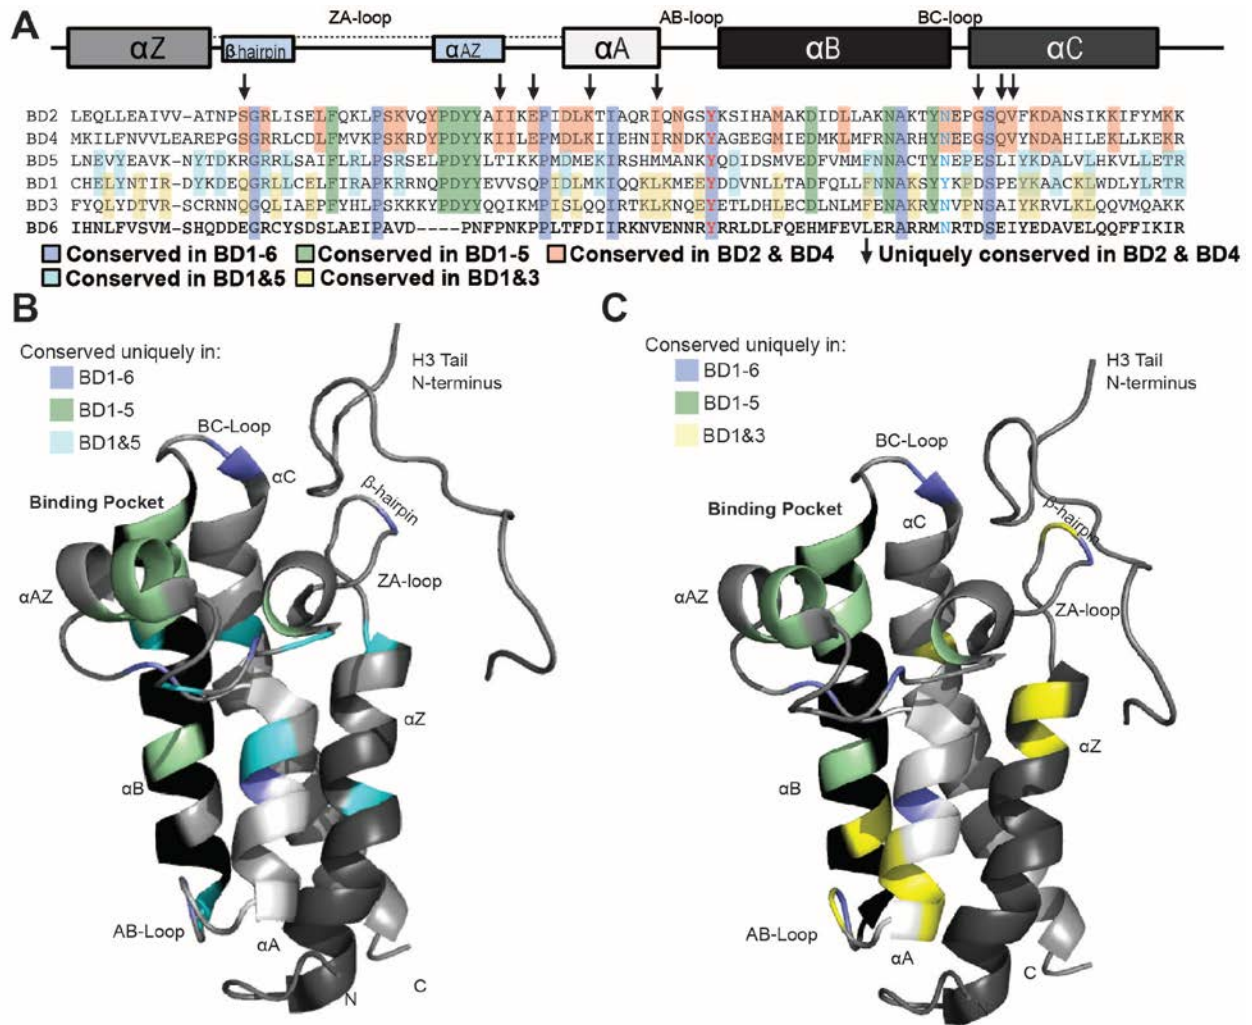

**Figure S1.** BD1, BD3, and BD5 conserved residues located away from histone interacting region. **(A)** Sequence alignment of PBRM1 bromodomains. Shading and arrows reflect the degree of conservation between bromodomains. Residues commonly mutated in ccRCC are shown with red and blue text. Structural elements of a bromodomain are indicated above the alignments. Conserved residues are overlaid on an NMR-derived secondary structure of PBRM1 BD2 in association with histone H3 tail with residues shared between **(B)** only BD1 and BD5 shaded in blue and **(C)** only shared between BD1 and BD3 in yellow.

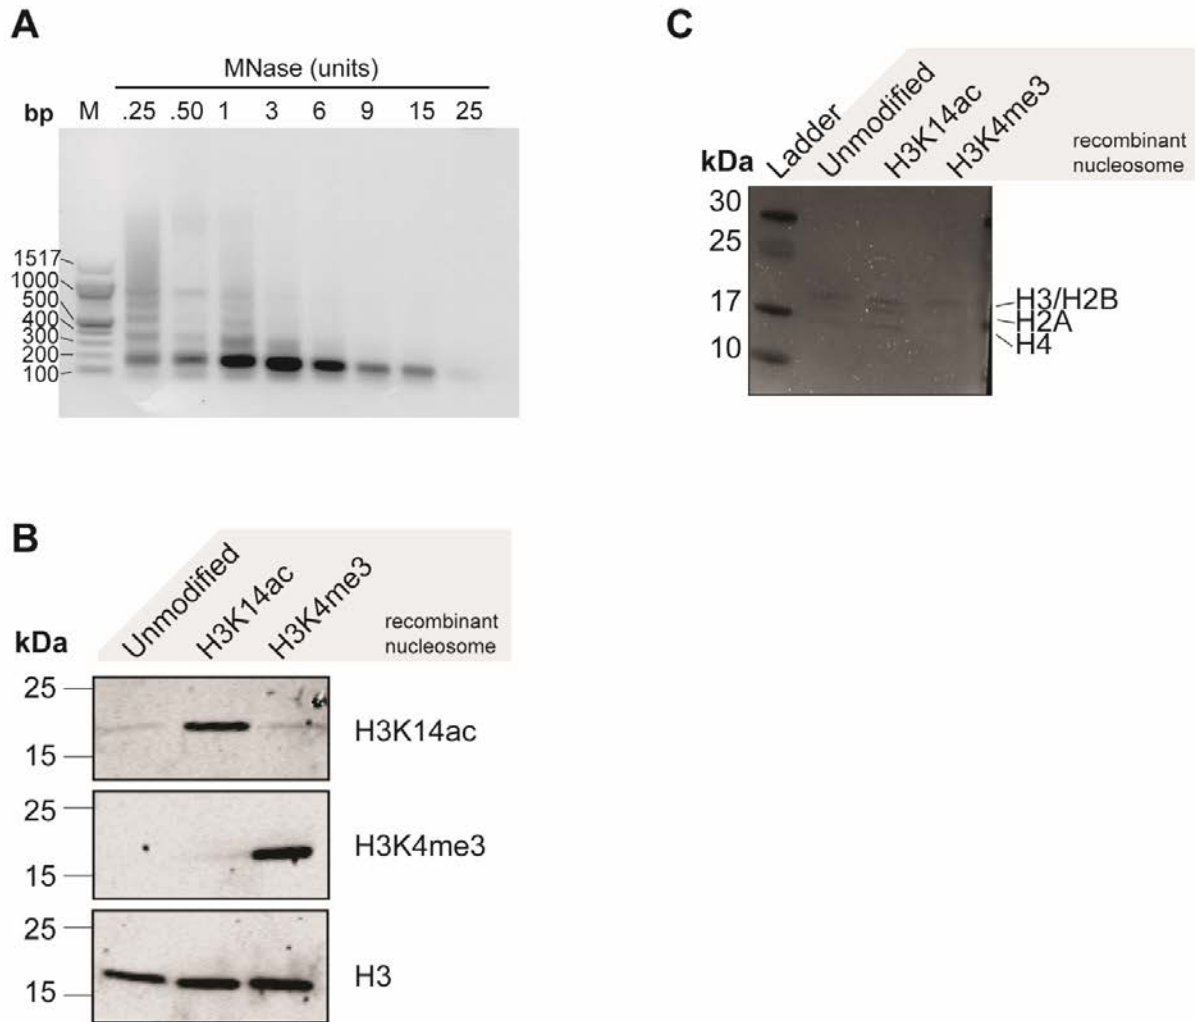

**Figure S2.** (A) *In nucleo* digestion of HEK293 cells with varying concentrations of MNase. (B) Validation of modified recombinant nucleosomes by Western blot. (C) Coomassie stained SDS-PAGE gel of recombinant nucleosomes. Presence of all four core histones are indicated.

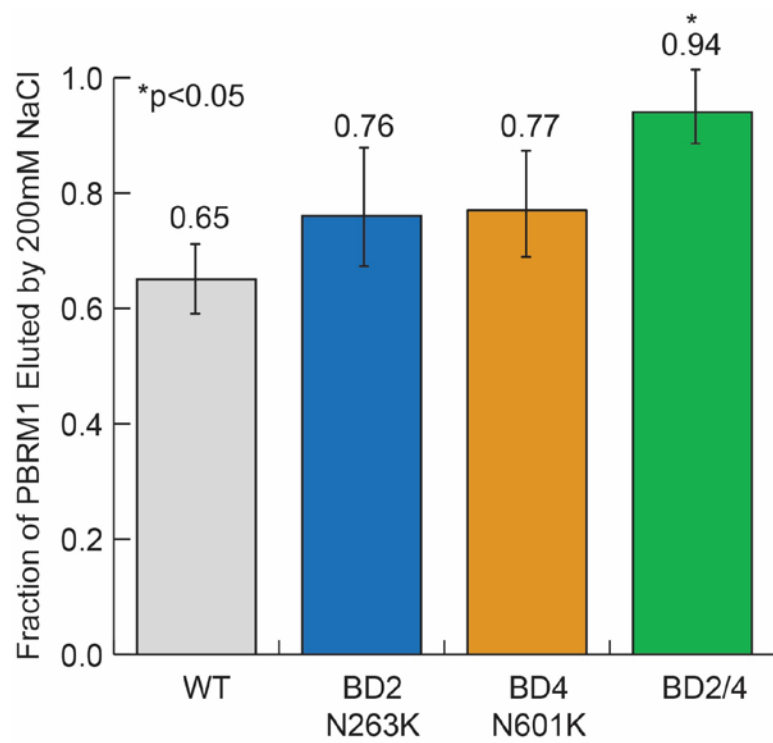

**Figure S3.** Percent of PBRM1 eluted as calculated by the sum of PBRM1 eluted from 50 mM, 100 mM and 200 mM NaCl plotted over total PBRM1 eluted.
